# Supplementary material for: Lack of serological and molecular evidence of arbovirus infections in bats from Brazil
Source: PubMed Central journal article supplement (PMC6221338; doi:10.1371/journal.pone.0207010), 2018-11-07
Supplement: pone.0207010.s005.pdf [file pone.0207010.s005.pdf]

# Alphavirus Primers

## Alignment with reference sequences

### PCR – Forward ( $\alpha$ .nsP4.PF)

|                                                                                          | 430    | 440     | 450    | 460    | 470     |
|------------------------------------------------------------------------------------------|--------|---------|--------|--------|---------|
| gi 9629246 ref NC 001786.1  Barmah Forest virus complete genome                          | ATAAAR | TCGATG  | ATCCAG | ATCCAG | TGGATCA |
| gi 21218484 ref NC 003899.1  Eastern equine encephalitis virus complete genome           | ATAACA | ACGGATG | GTTCG  | CTTCG  | TCGCA   |
| gi 685497472 ref NC 024887.1  Middelburg virus isolate ArB-8422 complete genome          | ATCAGA | ACGGACG | ATCCAG | CTTCG  | TCGCA   |
| gi 226823166 ref NC 012561.1  Highlands J virus complete genome                          | ACTGCA | ACGGACG | ATCCAG | CTTCG  | TCGCA   |
| gi 9627007 ref NC 001512.1  Onyong-nyong virus complete genome                           | ACCAAG | ACGGACG | ATCCAG | CTTCG  | TCGCA   |
| gi 9790297 ref NC 001544.1  Ross River virus complete genome                             | ACCAAG | ACGGACG | ATCCAG | CTTCG  | TCGCA   |
| gi 16767845 ref NC 003215.1  Semliki forest virus complete genome                        | ACCAAG | ACGGACG | ATCCAG | CTTCG  | TCGCA   |
| gi 9790313 ref NC 001547.1  Sindbis virus complete genome                                | ATCAGA | ACGGACG | ATCCAG | CTTCG  | TCGCA   |
| gi 9626526 ref NC 001449.1  Venezuelan equine encephalitis virus complete genome         | ACTGTA | ATCCAG  | ATCCAG | CTTCG  | TCGCA   |
| gi 21238454 ref NC 003908.1  Western equine encephalomyelitis virus complete genome      | ATTGTA | ATCCAG  | ATCCAG | CTTCG  | TCGCA   |
| gi 27754751 ref NC 004162.2  Chikungunya virus complete genome                           | ACCAAR | ACGGACG | ATCCAG | CTTCG  | TCGCA   |
| gi 21218488 ref NC 003900.1  Aura virus complete genome                                  | ACCAAG | ACGGACG | ATCCAG | CTTCG  | TCGCA   |
| gi 379765038 ref NC 016961.1  Whataroa virus complete genome                             | ACCAAG | ACGGACG | ATCCAG | CTTCG  | TCGCA   |
| gi 269954645 ref NC 013528.1  Fort Morgan virus complete genome                          | ATGGAA | ACGGACG | ATCCAG | CTTCG  | TCGCA   |
| gi 56692396 ref NC 006558.1  Getah virus complete genome                                 | ACCAAG | ACGGACG | ATCCAG | CTTCG  | TCGCA   |
| gi 19073904 ref NC 003417.1  Mayaro virus complete genome                                | ACCAAG | ACGGACG | ATCCAG | CTTCG  | TCGCA   |
| gi 379765013 ref NC 016959.1  Ndumu virus complete genome                                | ACCAAG | ACGGACG | ATCCAG | CTTCG  | TCGCA   |
| gi 379765069 ref NC 016962.1  Bebaru virus complete genome                               | ACCAAG | ACGGACG | ATCCAG | CTTCG  | TCGCA   |
| gi 19352423 ref NC 003433.1  Sleeping disease virus complete genome                      | TCCGAG | ACGGACG | ATCCAG | CTTCG  | TCGCA   |
| gi 21321727 ref NC 003930.1  Salmon pancreas disease virus complete genome               | TCCGTA | ACGGATG | ATCCAG | CTTCG  | TCGCA   |
| gi 380034914 ref NC 016960.1  Southern elephant seal virus complete genome               | ATCGCA | ACGGATG | ATCCAG | CTTCG  | TCGCA   |
| gi 406356611 ref NC 018615.1  Eilat virus isolate EO329 complete genome                  | ATCAGA | ACGGACG | ATCCAG | CTTCG  | TCGCA   |
| gi 596458719 ref NC 023812.1  Madariaga virus strain MADV/Cebus apella/BRA/BEAN5122/1956 | ACACCA | ACGGATG | ATCCAG | CTTCG  | TCGCA   |
| alpha.nsP4.PF                                                                            |        |         |        | TAYYD  | GA      |

### PCR – Reverse ( $\alpha$ .nsP4.PR)

|                                                                                          | 230       | 240     | 250     | 2       |
|------------------------------------------------------------------------------------------|-----------|---------|---------|---------|
| gi 9629246 ref NC 001786.1  Barmah Forest virus complete genome                          | AGTGGCAAT | GGCTTAC | AGCTTGA | CAACAT  |
| gi 21218484 ref NC 003899.1  Eastern equine encephalitis virus complete genome           | AGTGGAAAG | GGCTTAC | AGCTTGA | CAACAT  |
| gi 685497472 ref NC 024887.1  Middelburg virus isolate ArB-8422 complete genome          | GCAGGCAGC | GGCTTAC | AGCTTGA | CAACAT  |
| gi 226823166 ref NC 012561.1  Highlands J virus complete genome                          | AAAGGGAGT | GGCTTAC | AGCTTGA | CAACAT  |
| gi 9627007 ref NC 001512.1  Onyong-nyong virus complete genome                           | GCTGCCAGG | GGCTTAC | AGCTTGA | CAACAT  |
| gi 9790297 ref NC 001544.1  Ross River virus complete genome                             | GCGGTAAAG | GGCTTAC | AGCTTGA | CAACAT  |
| gi 16767845 ref NC 003215.1  Semliki forest virus complete genome                        | GCTGTAGC  | GGCTTAC | AGCTTGA | CAACAT  |
| gi 9790313 ref NC 001547.1  Sindbis virus complete genome                                | GCTGGGAGC | GGCTTAC | AGCTTGA | CAACAT  |
| gi 9626526 ref NC 001449.1  Venezuelan equine encephalitis virus complete genome         | ACTGCCAGG | GGCTTAC | AGCTTGA | CAACAT  |
| gi 21238454 ref NC 003908.1  Western equine encephalomyelitis virus complete genome      | ACTGGCAAT | GGCTTAC | AGCTTGA | CAACAT  |
| gi 27754751 ref NC 004162.2  Chikungunya virus complete genome                           | GCCCGTAGC | GGCTTAC | AGCTTGA | CAACAT  |
| gi 21218488 ref NC 003900.1  Aura virus complete genome                                  | ACTGGTAGG | GGCTTAC | AGCTTGA | CAACAT  |
| gi 379765038 ref NC 016961.1  Whataroa virus complete genome                             | GCGGGTAGT | GGCTTAC | AGCTTGA | CAACAT  |
| gi 269954645 ref NC 013528.1  Fort Morgan virus complete genome                          | GTTGGTAA  | GGCTTAC | AGCTTGA | CAACAT  |
| gi 56692396 ref NC 006558.1  Getah virus complete genome                                 | GCCGGGAGC | GGCTTAC | AGCTTGA | CAACAT  |
| gi 19073904 ref NC 003417.1  Mayaro virus complete genome                                | GCTGGTAGA | GGCTTAC | AGCTTGA | CAACAT  |
| gi 379765013 ref NC 016959.1  Ndumu virus complete genome                                | GCAGGCAGT | GGCTTAC | AGCTTGA | CAACAT  |
| gi 379765069 ref NC 016962.1  Bebaru virus complete genome                               | GCAGGCAGC | GGCTTAC | AGCTTGA | CAACAT  |
| gi 19352423 ref NC 003433.1  Sleeping disease virus complete genome                      | TTCAAGGCT | GGCTTAC | AGCTTGA | CAACAT  |
| gi 21321727 ref NC 003930.1  Salmon pancreas disease virus complete genome               | TTCAAGGCT | GGCTTAC | AGCTTGA | CAACAT  |
| gi 380034914 ref NC 016960.1  Southern elephant seal virus complete genome               | GTGGGAAGT | GGCTTAC | AGCTTGA | CAACAT  |
| gi 406356611 ref NC 018615.1  Eilat virus isolate EO329 complete genome                  | GCTGTAAGC | GGCTTAC | AGCTTGA | CAACAT  |
| gi 596458719 ref NC 023812.1  Madariaga virus strain MADV/Cebus apella/BRA/BEAN5122/1956 | AGGGCCAA  | GGCTTAC | AGCTTGA | CAACAT  |
| alpha.nsP4.PR                                                                            |           |         |         | GGCTTAC |
