# Supplementary material for: Lack of serological and molecular evidence of arbovirus infections in bats from Brazil
Source: PubMed Central journal article supplement (PMC6221338; doi:10.1371/journal.pone.0207010), 2018-11-07

## Flavivirus Primers

### Alignment with reference sequences

#### PCR – Forward (F.NS5P-F)

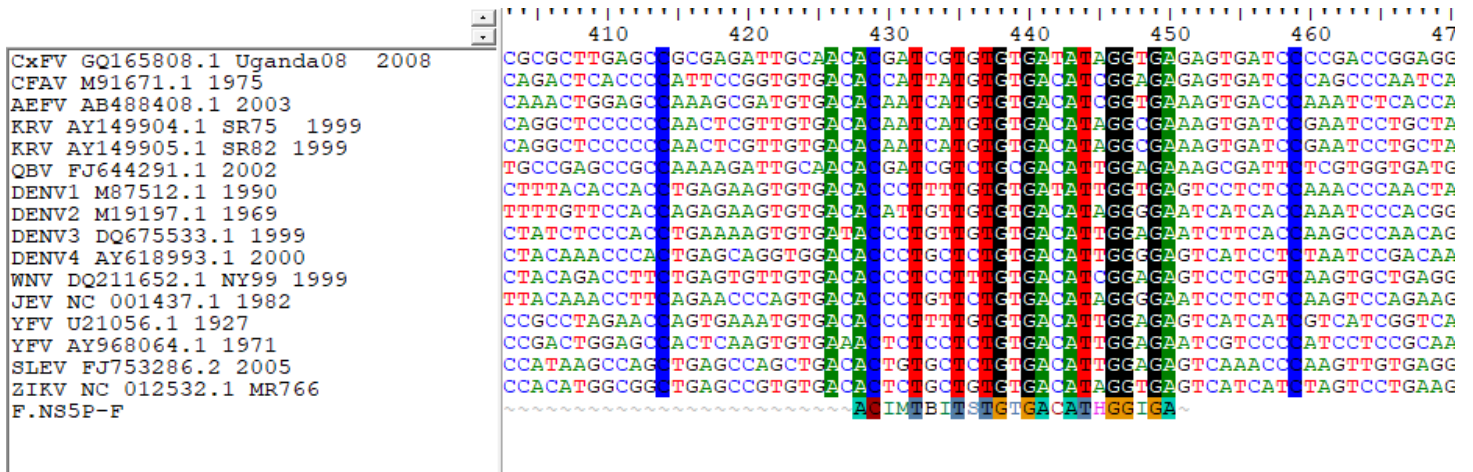

#### PCR – Reverse (F.NS5P-R)

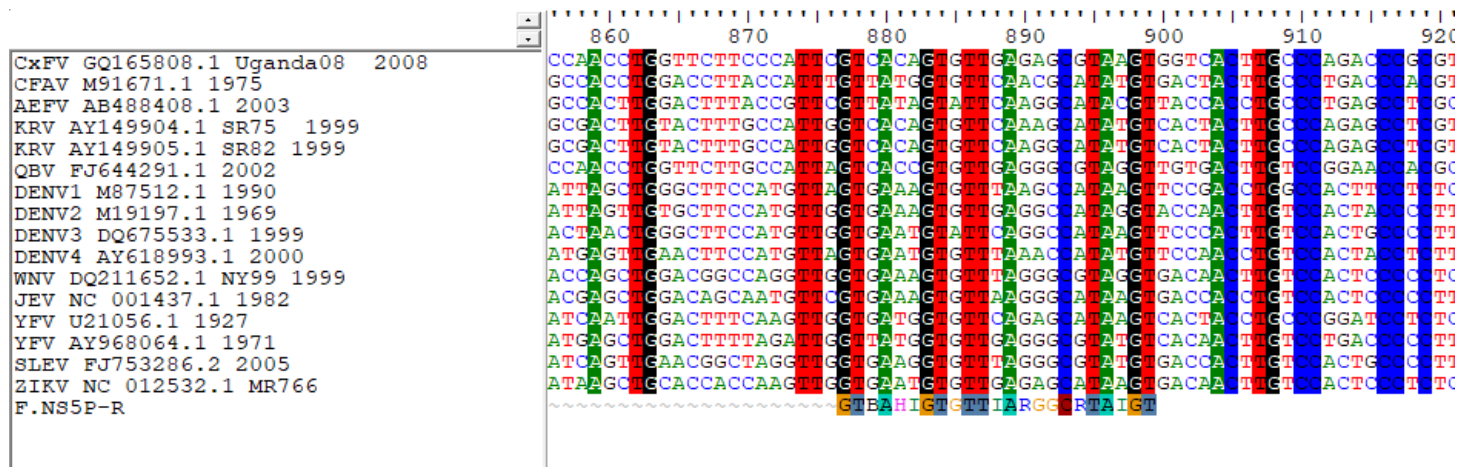

**NESTED-PCR – Forward (Flav100F) \***

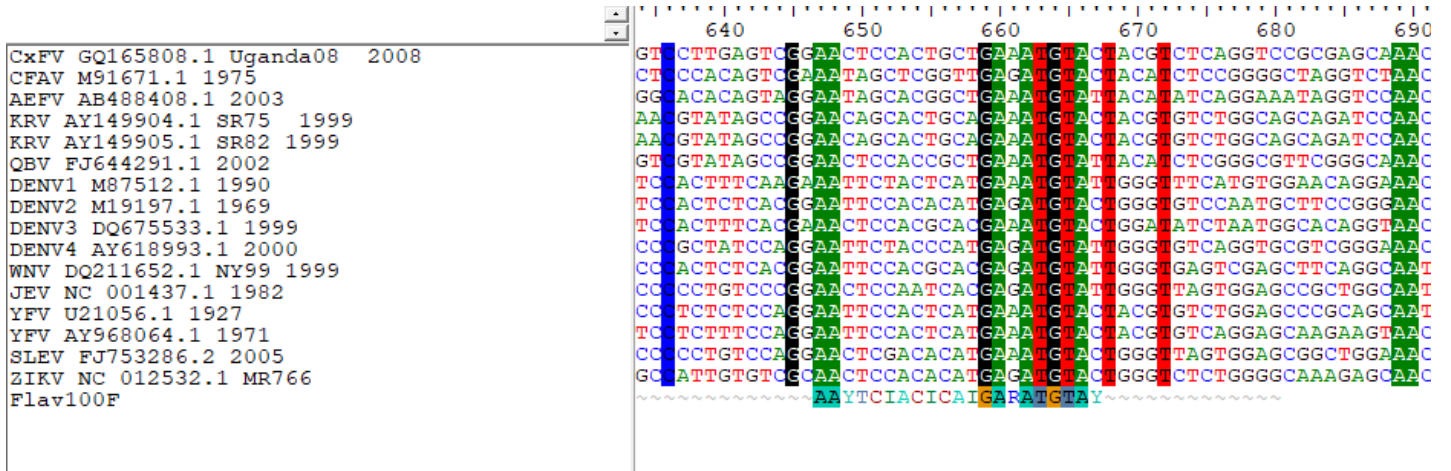

**NESTED-PCR – Reverse (Flav200R)\***

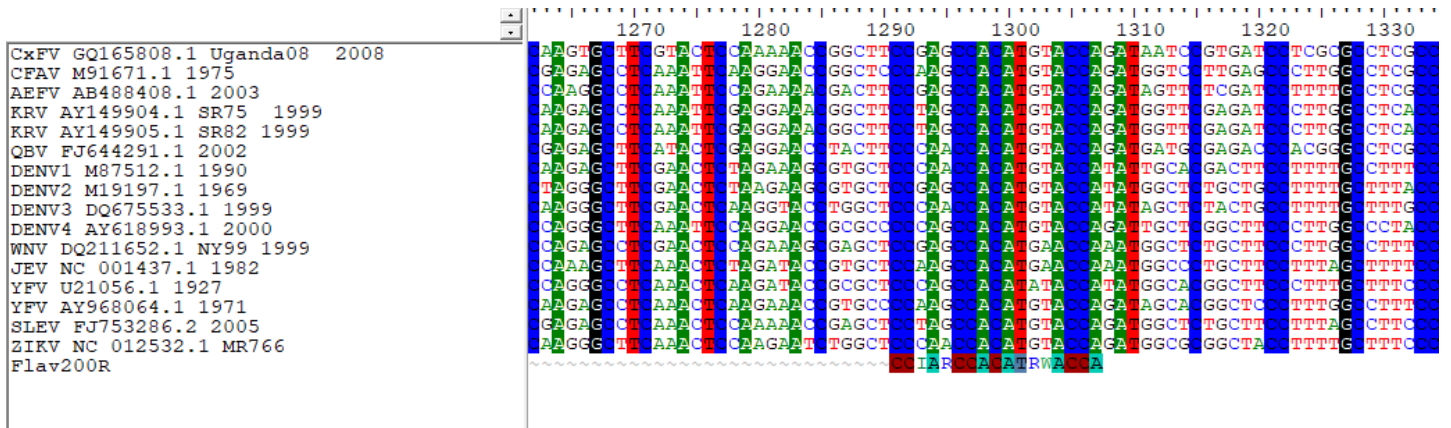

\* Maher-Sturgess SL, Forrester NL, Wayper PJ, Gould EA, Hall RA, et al. (2008) Universal primers that amplify RNA from all three *Flavivirus* subgroups. *Virol J* 5: 16.

**Experimental testing of the NESTED-PCR primer set**

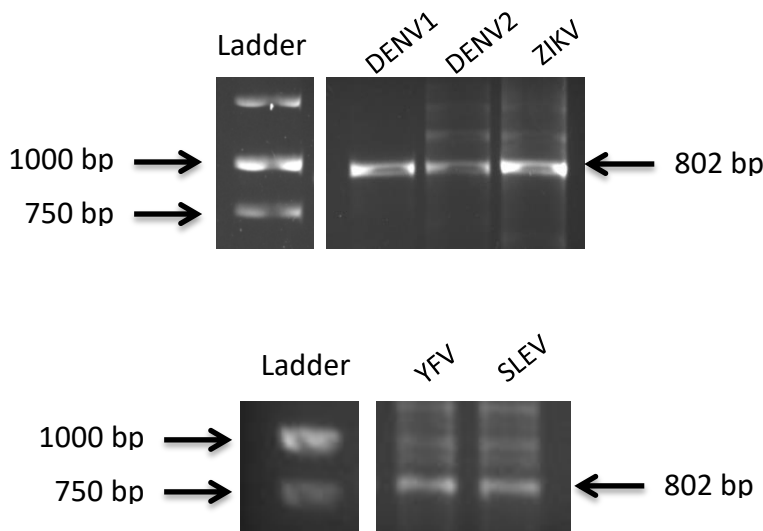

Supplement: pone.0207010.s006.pdf [file pone.0207010.s006.pdf]
